# Supplementary material for: Effects of Regulated Deficit Irrigation on Amino Acid Profiles and Their Derived Volatile Compounds in Cabernet Sauvignon (Vitis vinifera L.) Grapes and Wines
Source: PubMed Central journal article supplement (PMC6222330; doi:10.3390/molecules23081983), 2018-08-09
Supplement: molecules-23-01983-s001.pdf [file molecules-23-01983-s001.pdf]

# Effects of regulated deficit irrigation on amino acid profiles and their derived volatile compounds in Cabernet Sauvignon (*Vitis vinifera* L.) grapes and wines

Yan-lun Ju<sup>a†</sup>, Guo-qian Xu<sup>b†</sup>, Xiao-feng Yue<sup>a</sup>, Xian-fang Zhao<sup>a</sup>, Ting-yao Tu<sup>a</sup>, Jun-xiang Zhang<sup>b\*</sup> and Yu-lin Fang<sup>a,c\*</sup>

<sup>a</sup> College of Enology, Northwest A&F University, Yangling, Shaanxi, 712100 China; juyanlun2016@nwsuaf.edu.cn (Y.-L.J.); yuexiaofeng@nwsuaf.edu.cn (X.-F.Y.); zhaoxianfang@nwsuaf.edu.cn (X.-F.Z.); tuty@lzlj.com (T.-Y.T.)

<sup>b</sup> Ningxia Grape and Wine Research Institute, Ningxia University, Yinchuan, Ningxia, 750000 China; xugql@163.com (G.X.); zhangjunxiang@126.com (J.-X.Z.)

<sup>c</sup> Shaanxi Engineering Research Center for Viti-Viniculture, Yangling, Shaanxi, 712100 China

<sup>†</sup> These authors equally contributed to this work.

<sup>\*</sup> Correspondence: fangyulin@nwsuaf.edu.cn; Tel.: +86-29-87091874, Fax: 029-87092233

**Supplementary Materials:**

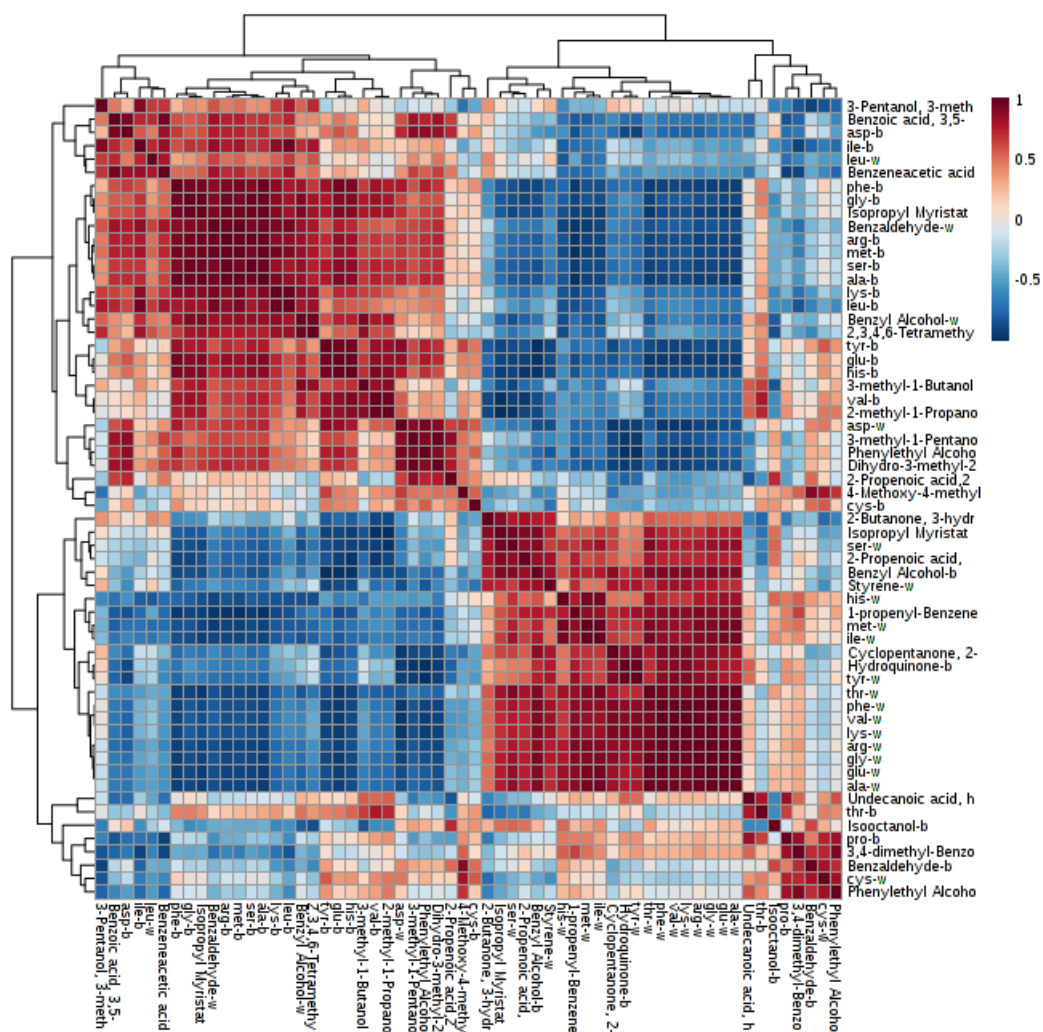

**Figure S1.** Correlation analysis of amino acids and volatile compounds in this study from grapes and wines with different treatments. Data was normalized by a pooled sample from control groups.

Figure S2

Standard

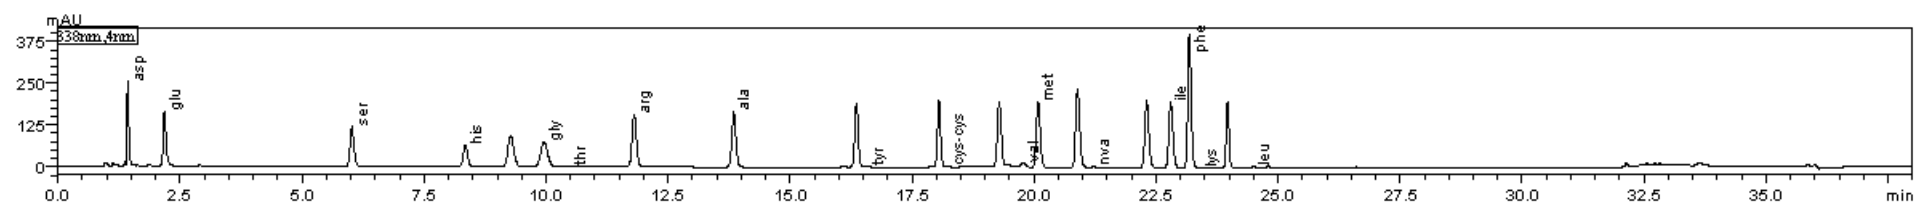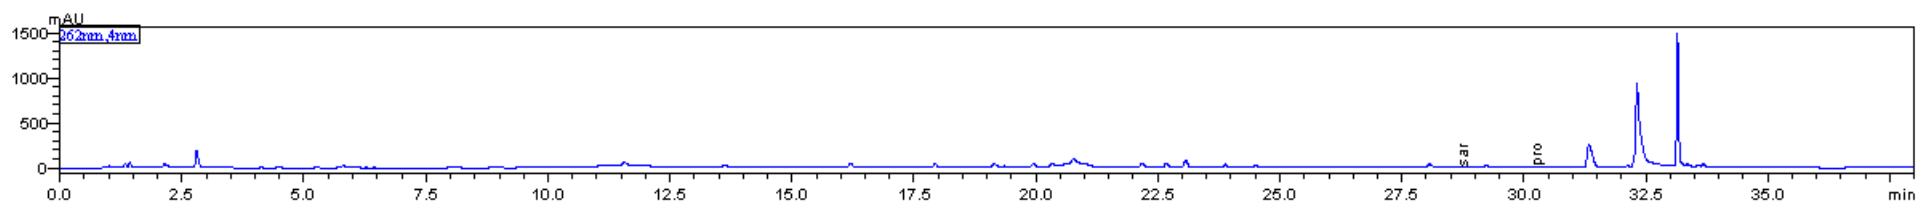

A

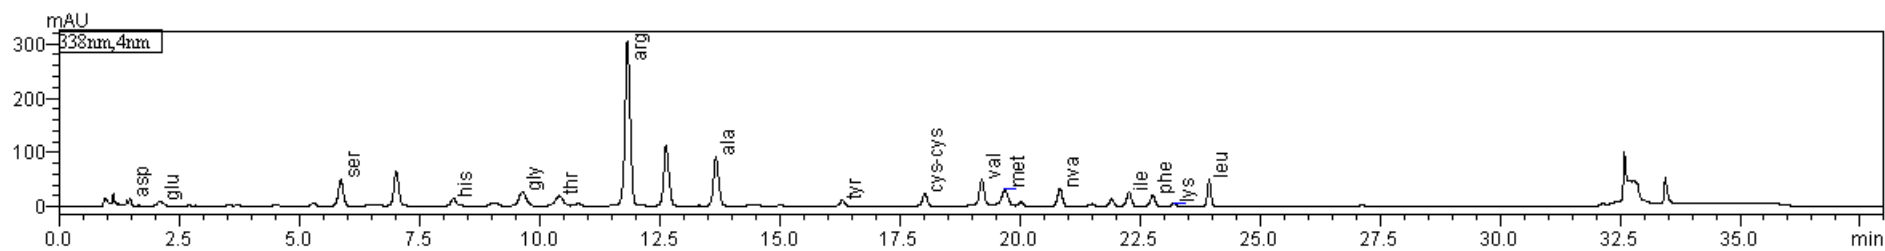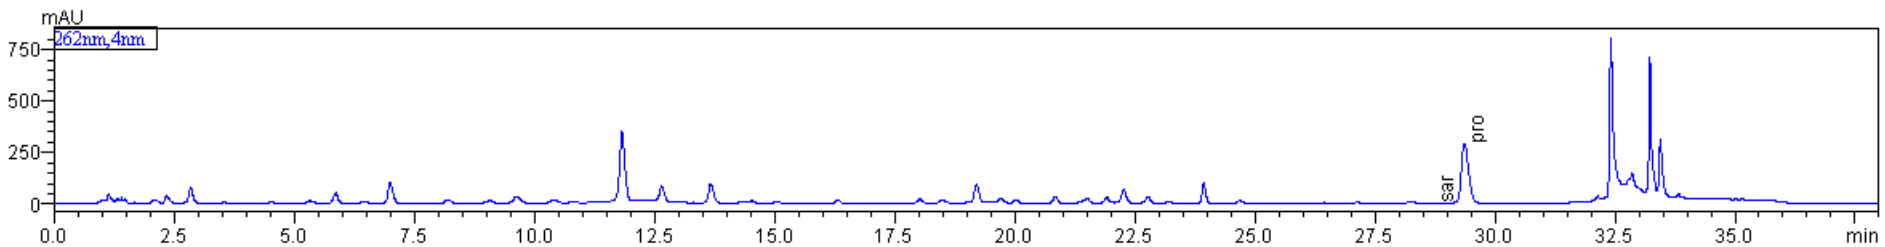

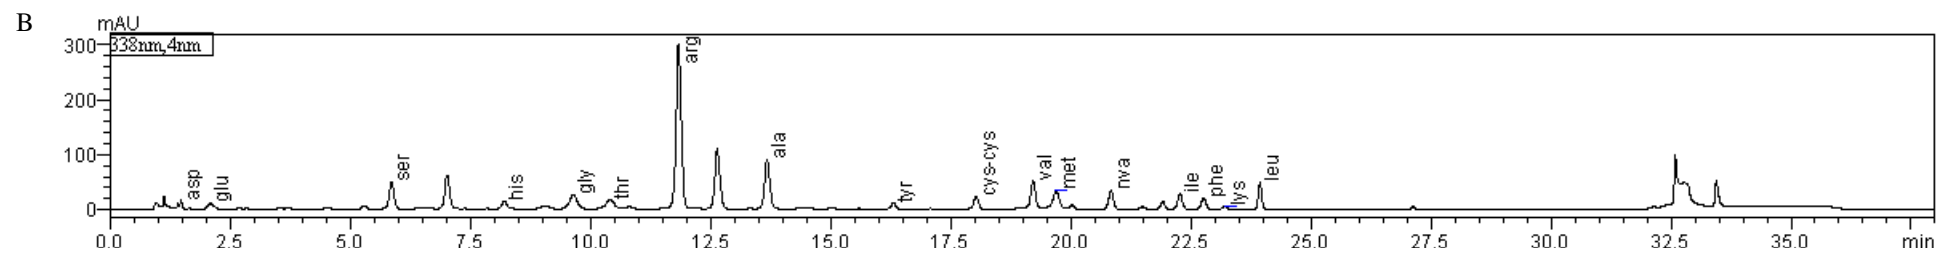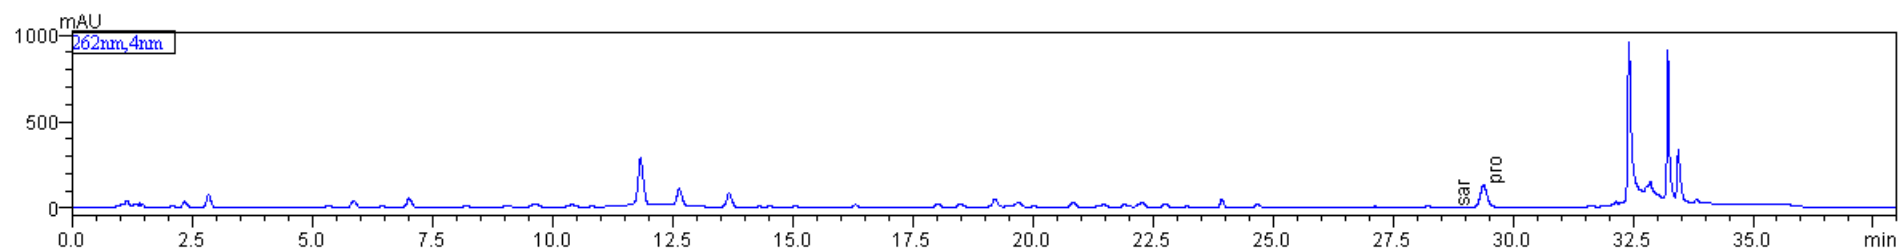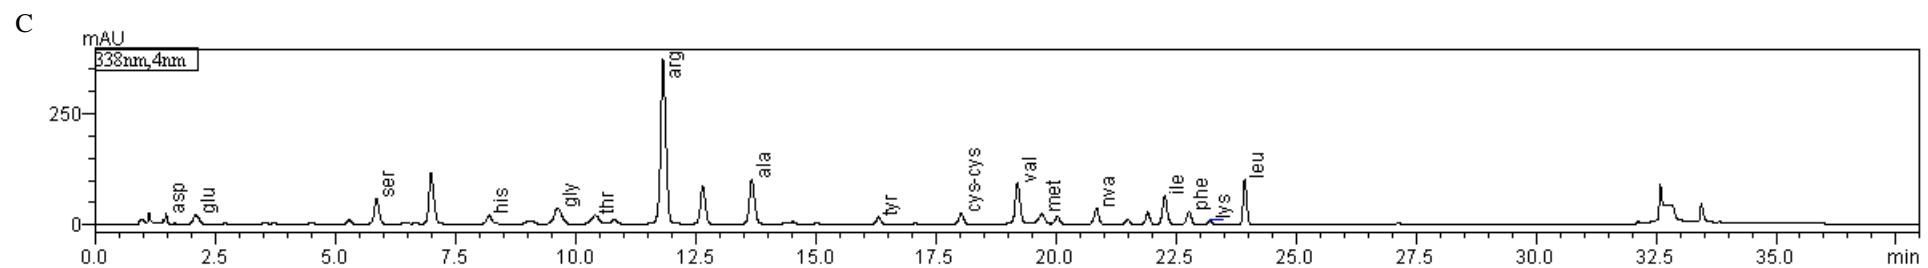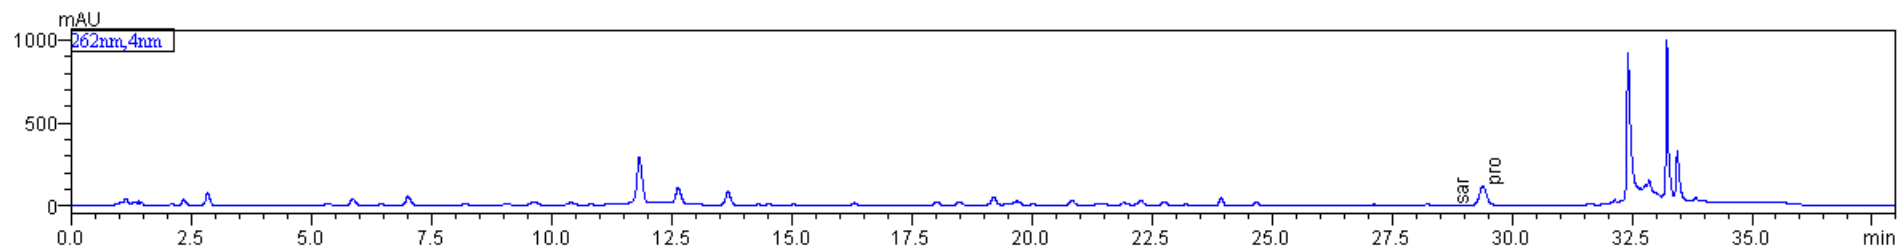

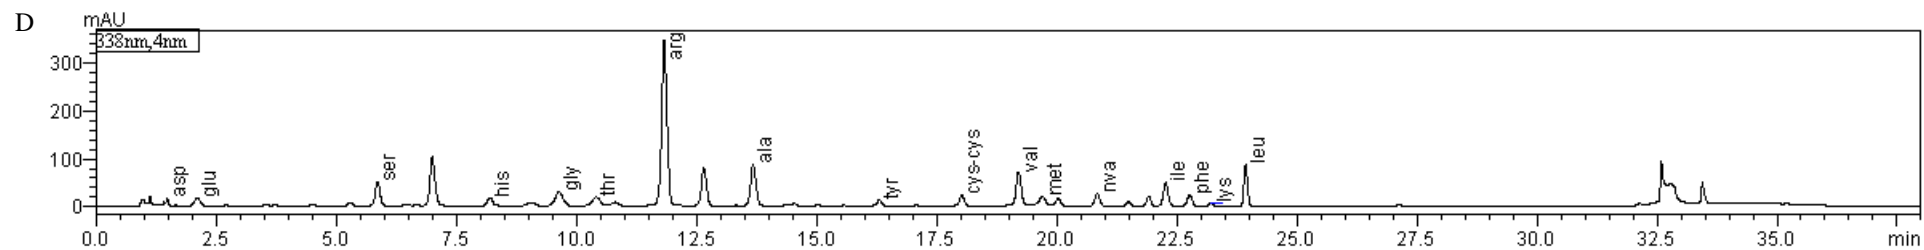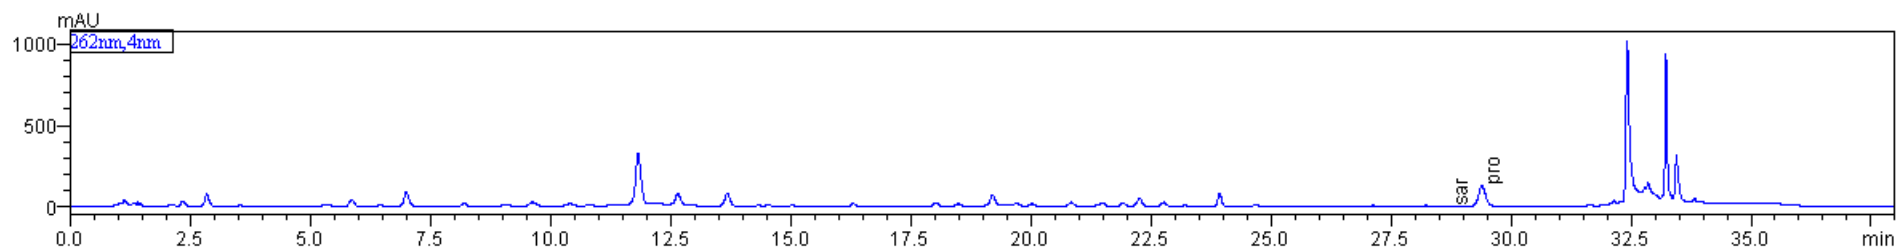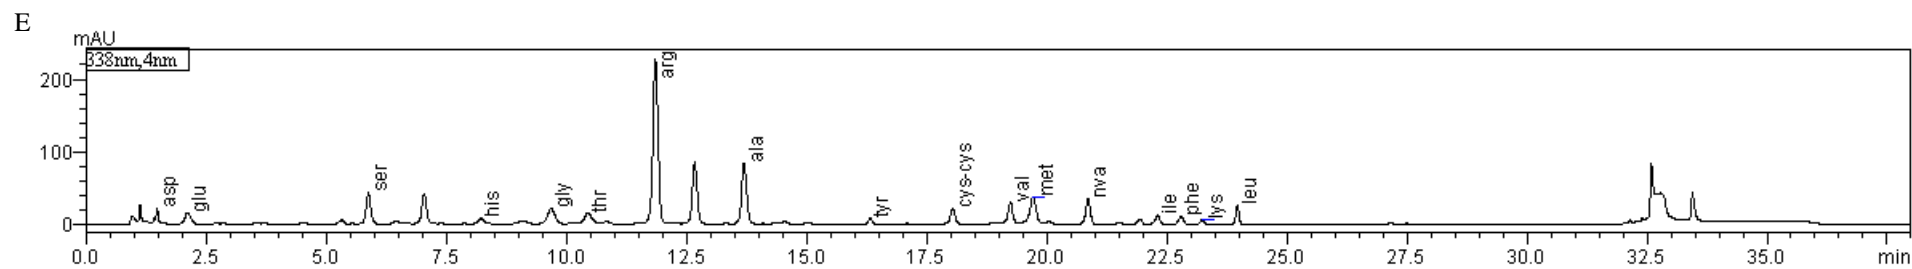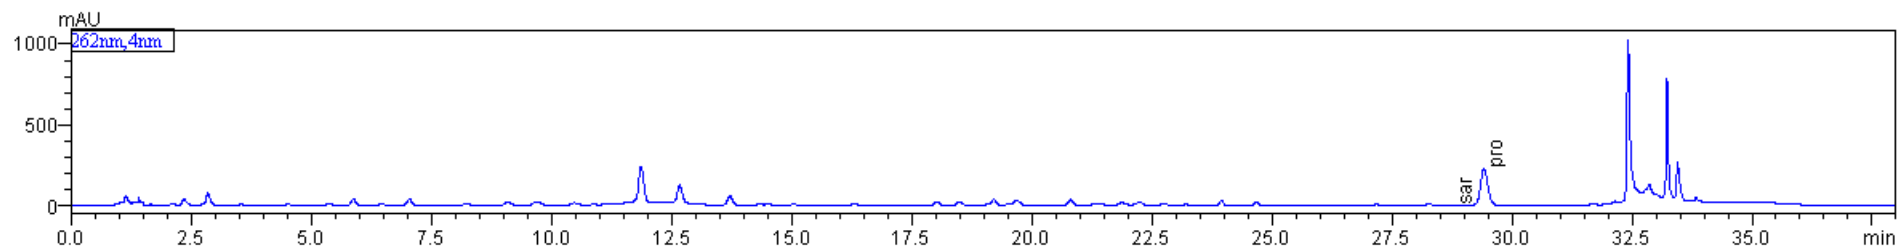

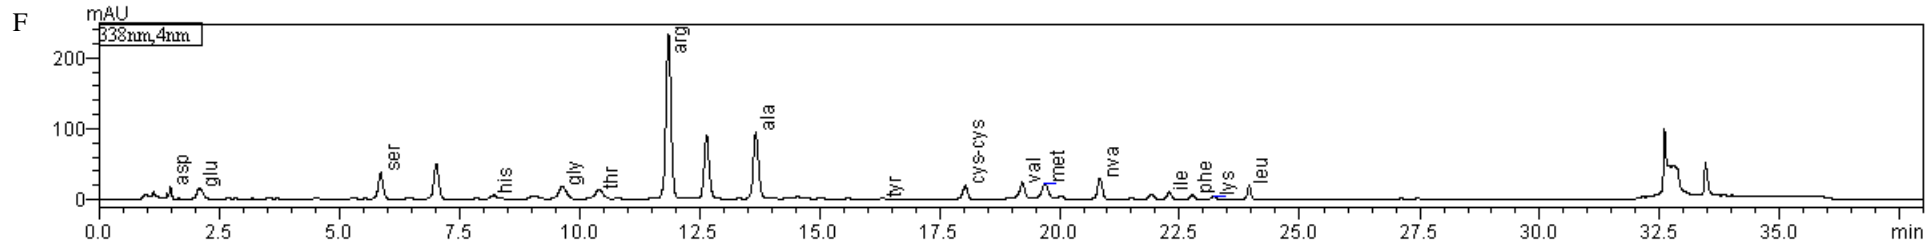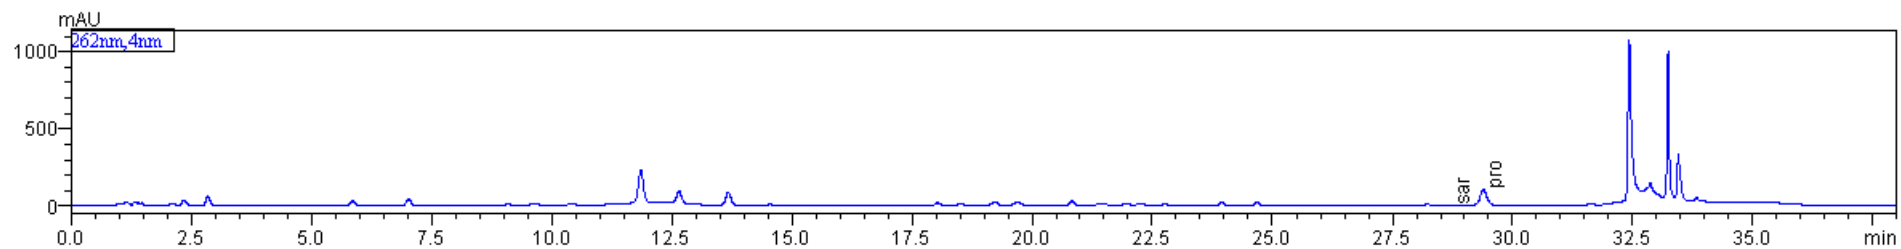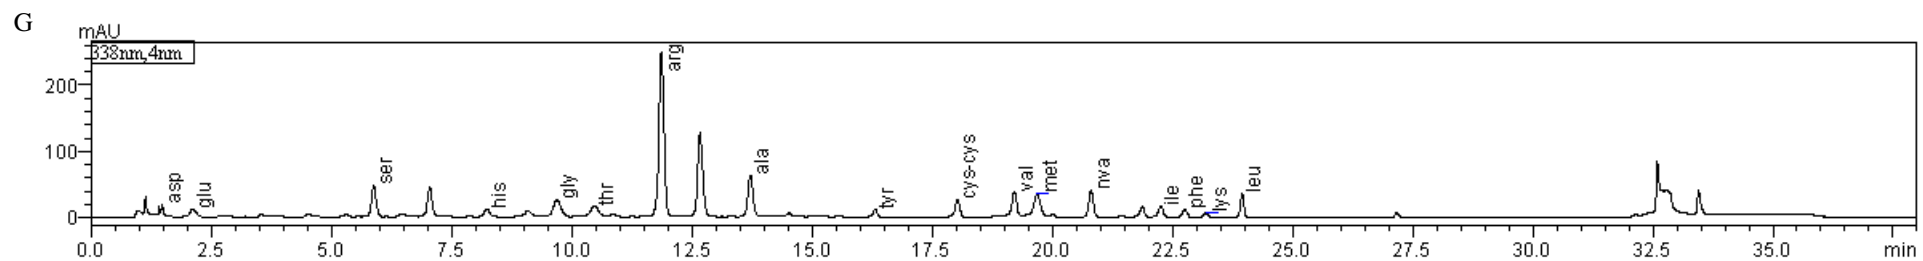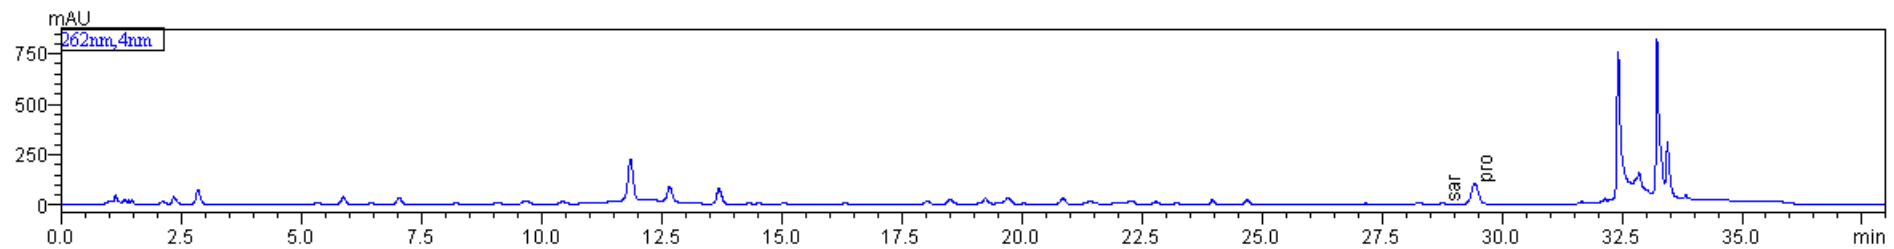

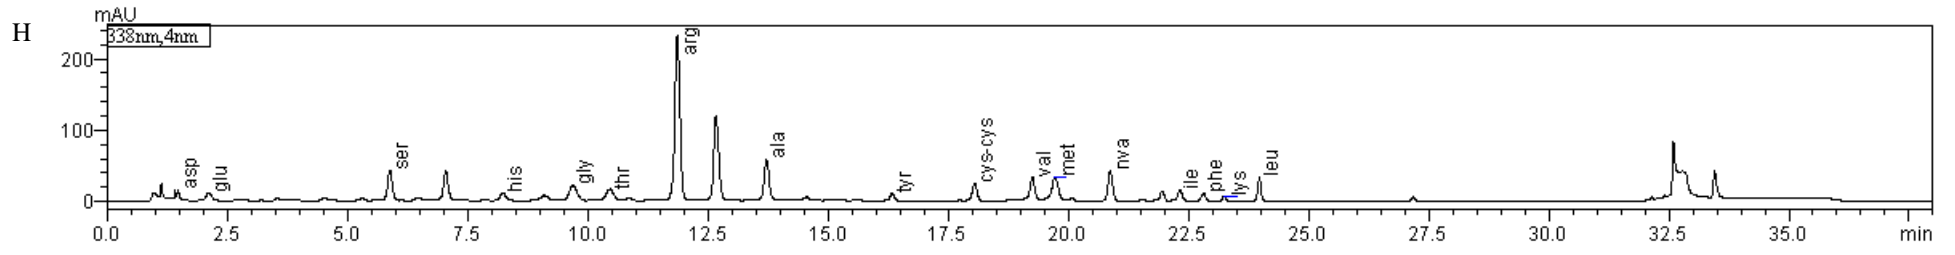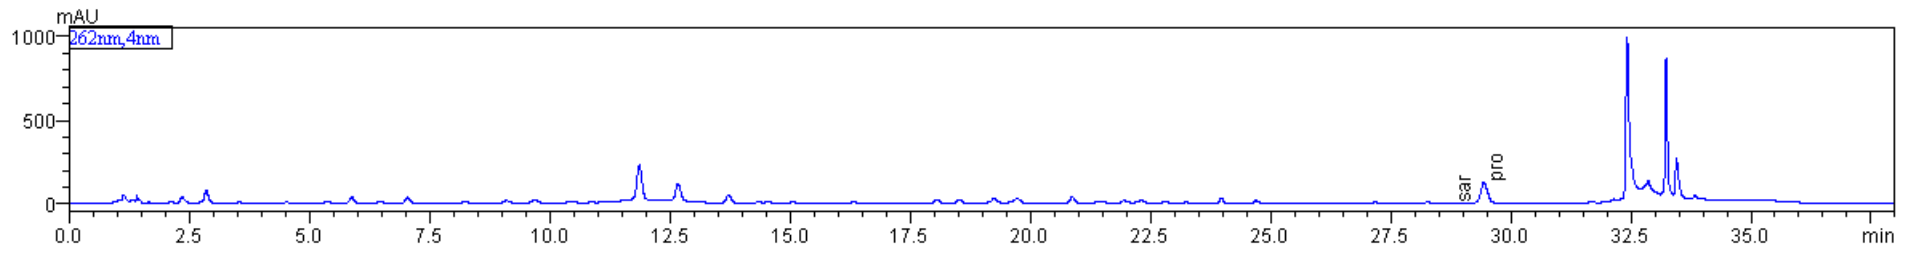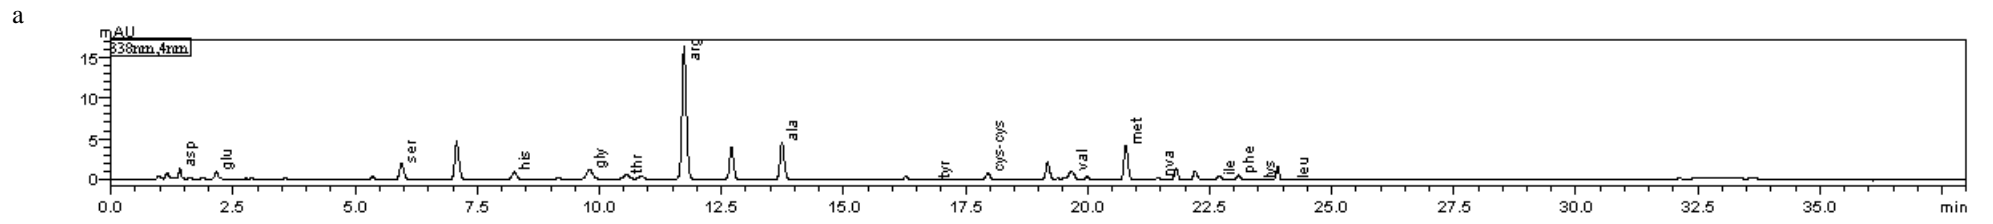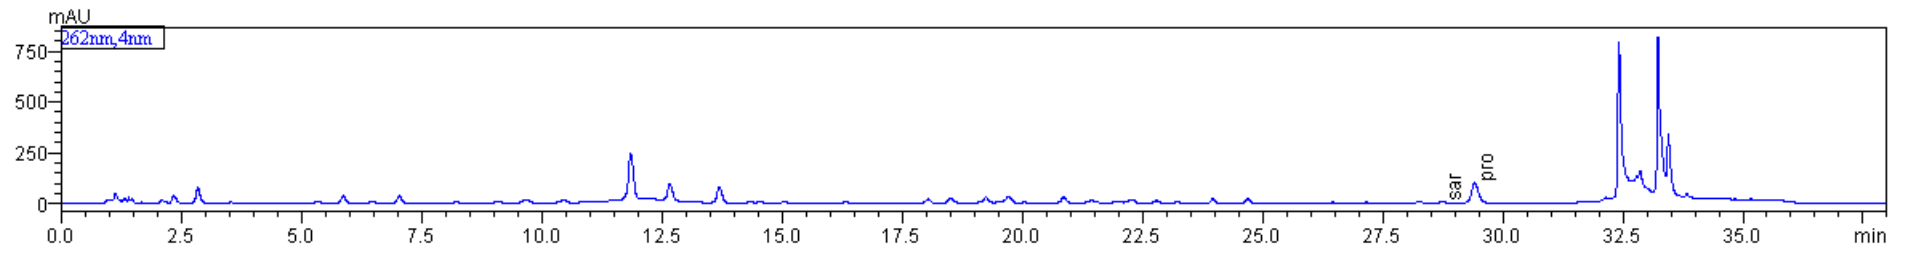

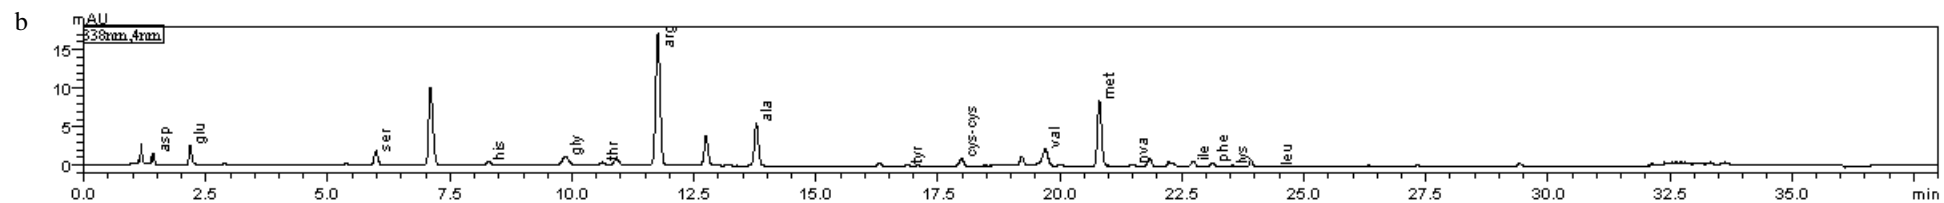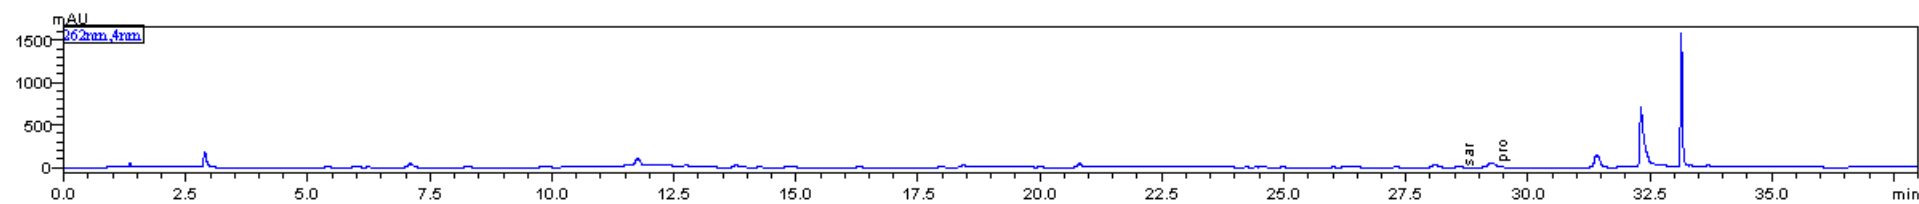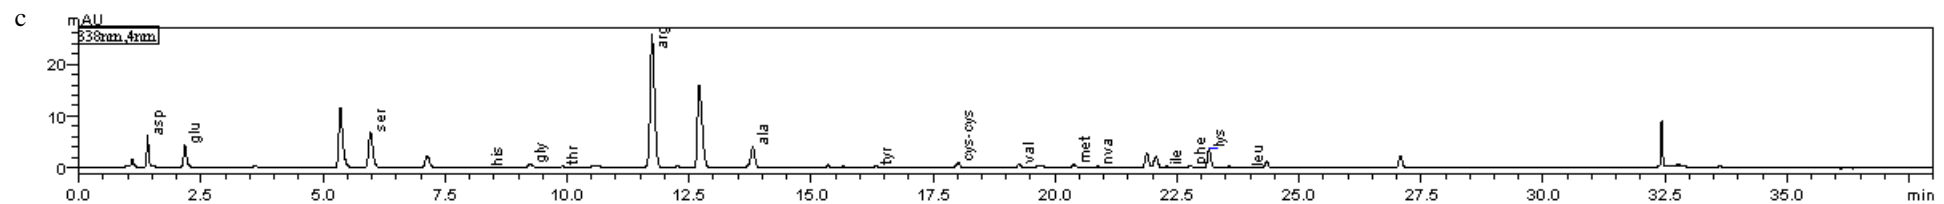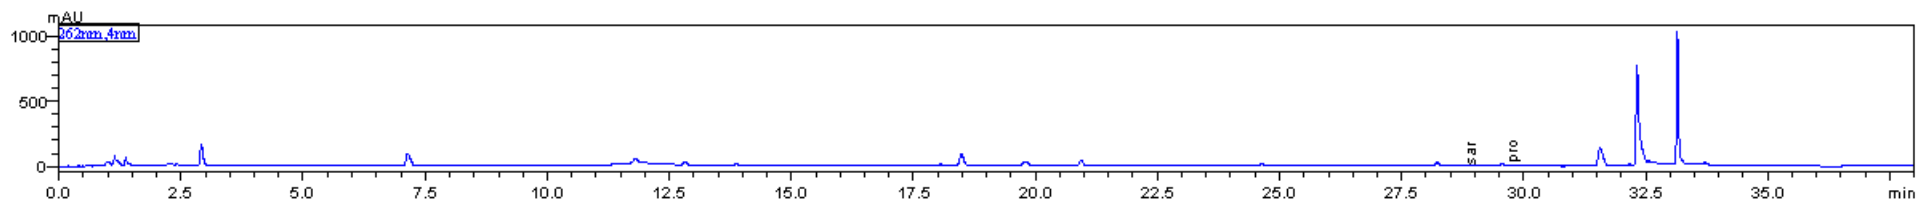



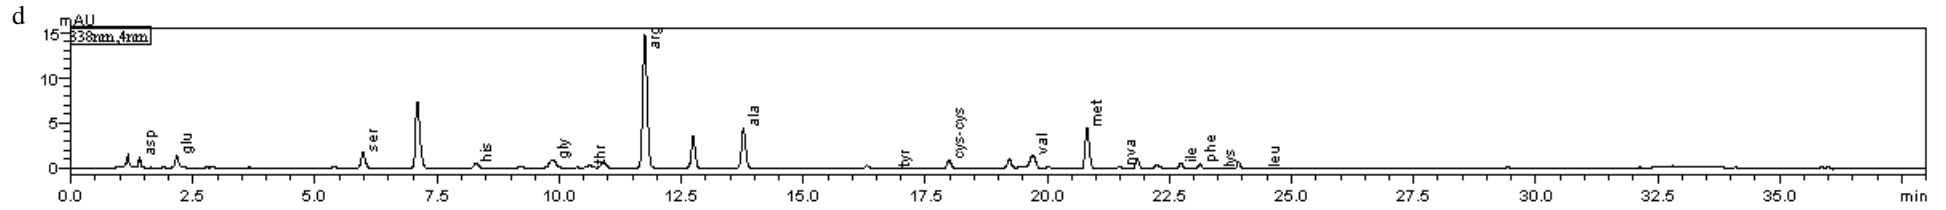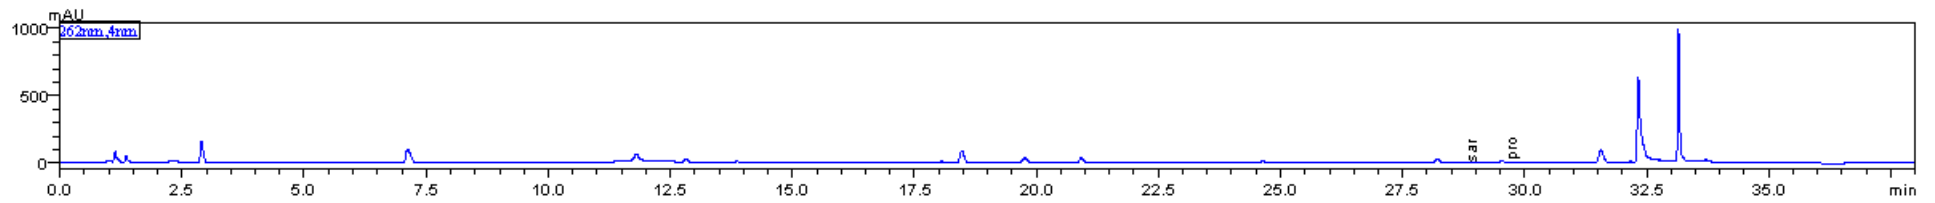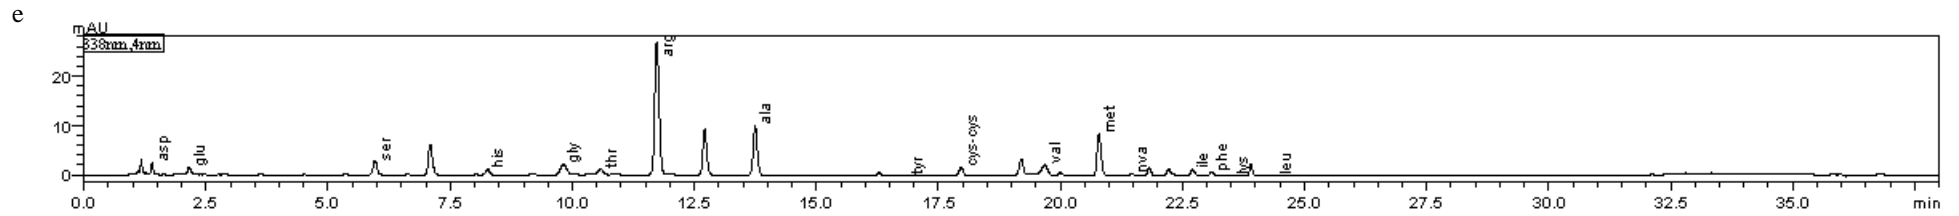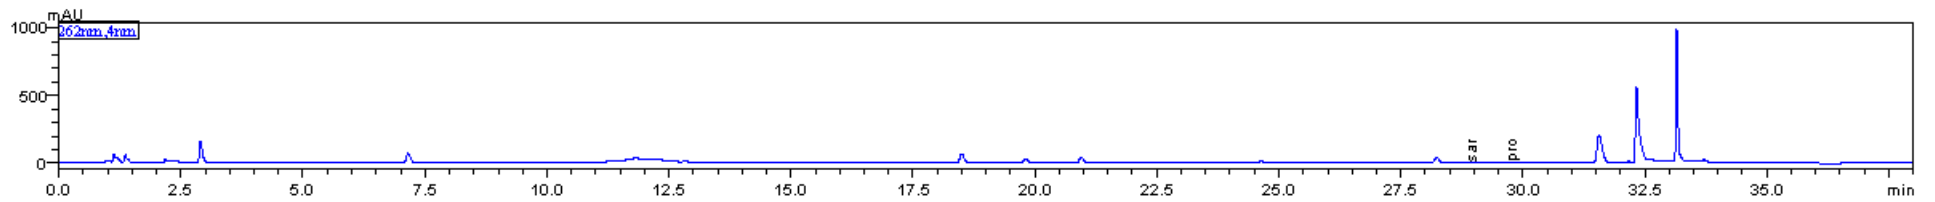

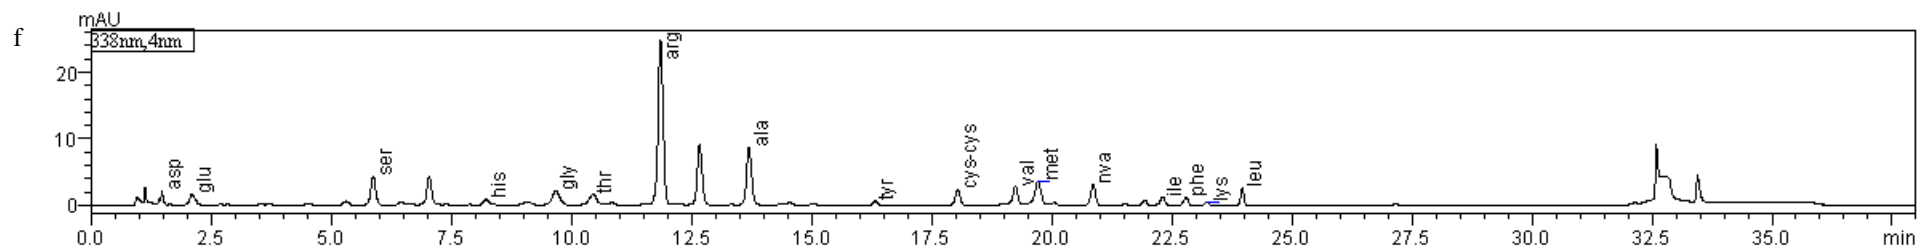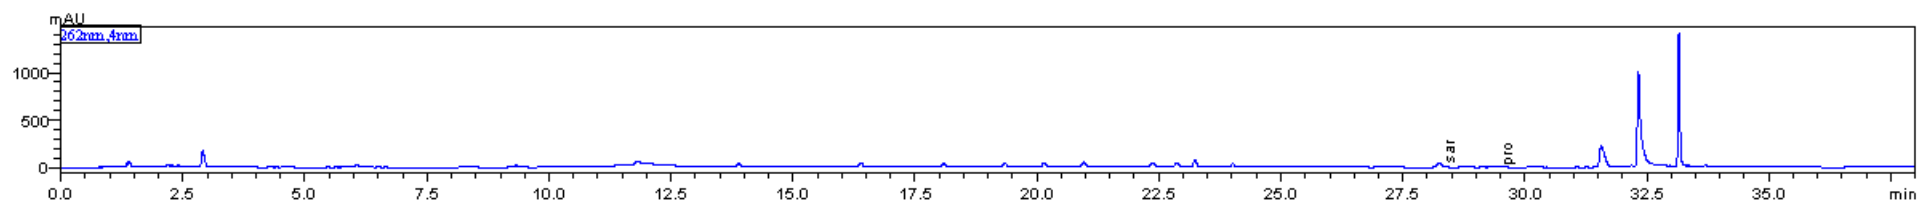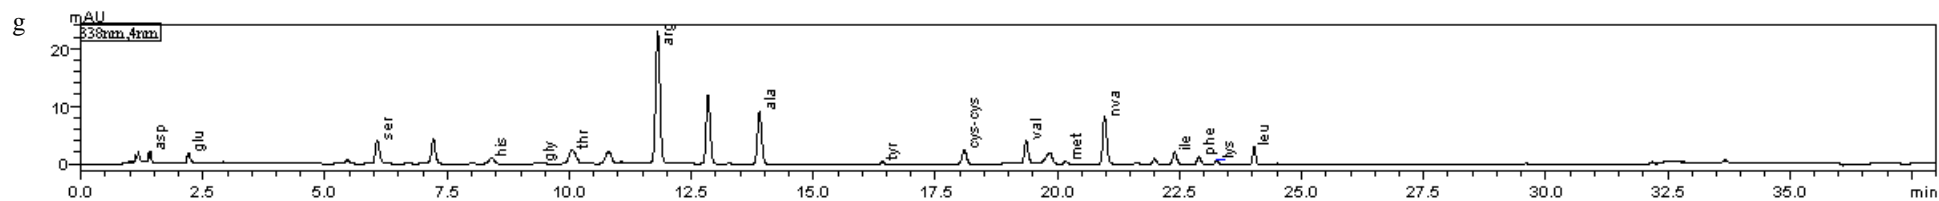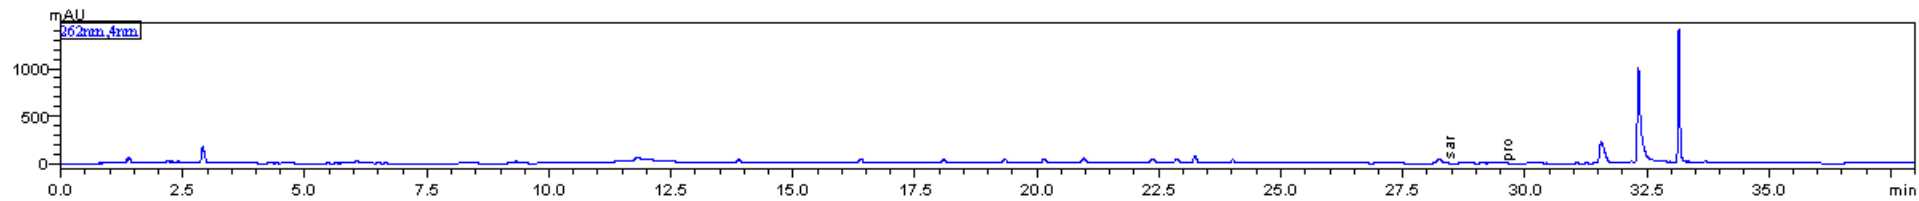

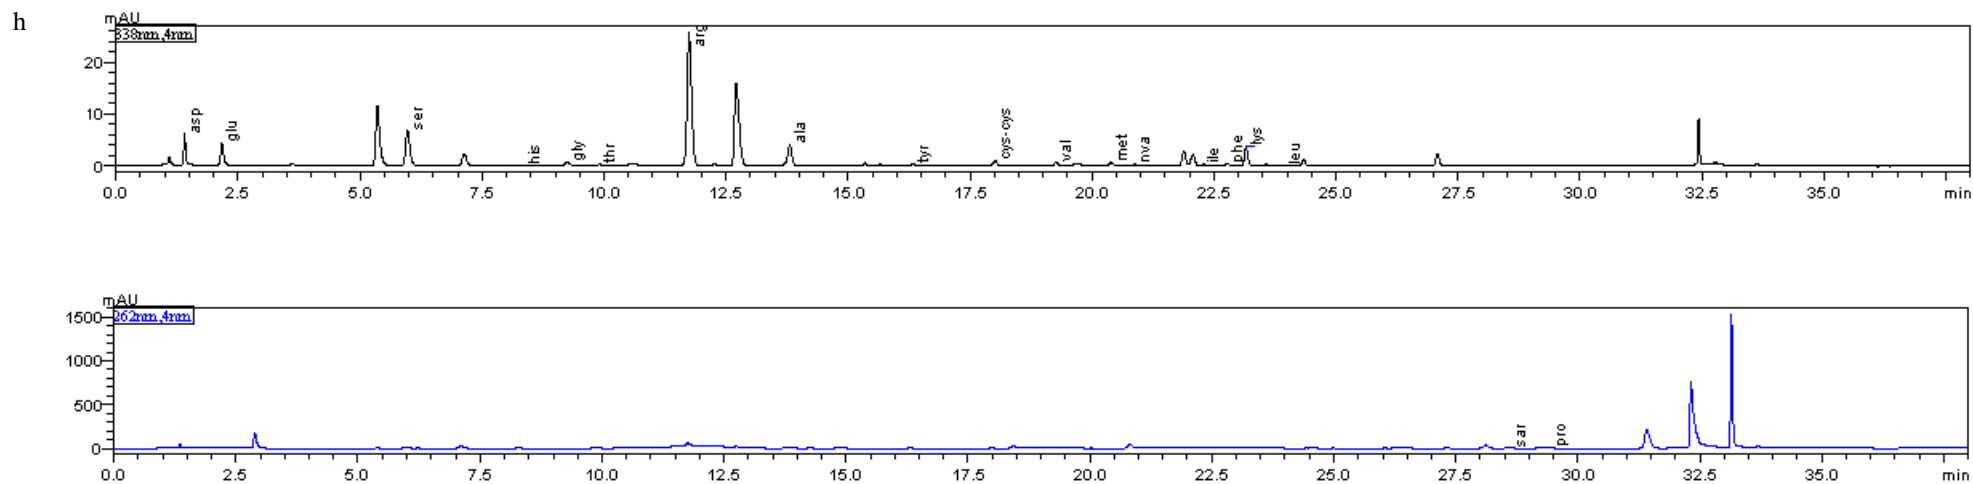

**Figure S2.** Chromatograms of the amino acid. Standard:Chromatograms of the amino acid standards; A:Chromatograms of the grape berries(RDI-1, 2015); B:Chromatograms of the grape berries(RDI-2, 2015); C:Chromatograms of the grape berries(RDI-3, 2015); D:Chromatograms of the grape berries(CK, 2015); E:Chromatograms of the grape berries(RDI-1, 2016); F:Chromatograms of the grape berries(RDI-2, 2016); G:Chromatograms of the grape berries(RDI-3, 2016); H:Chromatograms of the grape berries(CK, 2016); a: Chromatograms of the wines(RDI-1, 2015); b: Chromatograms of the wines(RDI-2, 2015); c: Chromatograms of the wines(RDI-3, 2015); d: Chromatograms of the wines(CK, 2015); e: Chromatograms of the wines(RDI-1, 2016); f: Chromatograms of the wines(RDI-2, 2016); g: Chromatograms of the wines(RDI-3, 2016); h: Chromatograms of the wines(CK, 2016).

**Table S1.** Meteorological data and irrigation amount during two years of this study.

|                               | Year | April   | May     | June    | July    | August  | September | Total  |
|-------------------------------|------|---------|---------|---------|---------|---------|-----------|--------|
| Daily average                 | 2015 | 14.54   | 18.47   | 23.93   | 24.8    | 21.26   | 17.36     | -      |
| temperature                   | 2016 | 13.81   | 17.48   | 24.26   | 24.50   | 23.59   | 15.61     | -      |
| (°C)                          |      |         |         |         |         |         |           |        |
| ET <sub>0</sub> April         | 2015 | 119.79  | 149.96  | 178.01  | 171.37  | 127.92  | 85.54     | 832.60 |
| 1–September                   | 2016 | 126.81  | 143.82  | 162.44  | 163.57  | 141.16  | 78.47     | 816.26 |
| 30 (mm)                       |      |         |         |         |         |         |           |        |
| Precipitation                 | 2015 | 5.8     | 37.6    | 22.5    | 33.5    | 12.2    | 32.7      | 144.3  |
| (mm)                          | 2016 | 25.9    | 10      | 48.9    | 43.4    | 23.8    | 34.2      | 186.2  |
| Solar net                     | 2015 | 2746.13 | 3448.88 | 3701.99 | 3651.97 | 3128.87 | 2235.12   | -      |
| radiation(J/cm <sup>2</sup> ) | 2016 | 2701.32 | 3318.34 | 3470.33 | 3642.65 | 3305.59 | 2118.51   | -      |

Note: the meteorological data obtained from micro weather station at experiment site. ET<sub>0</sub>:calculated from daily meteorological data according to FAO 56 (Allen et al., 1998).

Table S2 Volatile compounds concentration ( $\mu\text{g/L}$ ) in grape berries from untreated (CK) and treated vineyards.

| Compounds                                 | 2015          |               |               |               | 2016          |               |                |              |
|-------------------------------------------|---------------|---------------|---------------|---------------|---------------|---------------|----------------|--------------|
|                                           | RDI-1         | RDI-2         | RDI-3         | CK            | RDI-1         | RDI-2         | RDI-3          | CK           |
| Benzaldehyde                              | 3.73±0.1a     | 3.11±0.04b    | 3.70±0.09a    | 2.87±0.06b    | 1.96±0.13a    | 1.77±0.12a    | 1.64±0.11a     | 2.10±0.14a   |
| Benzyl Alcohol                            | 3.53±0.1ab    | 2.88±0.04c    | 3.88±0.06a    | 3.51±0.13b    | 2.45±0.14b    | 4.66±0.27a    | 3.28±0.19b     | 3.24±0.19b   |
| Phenylethyl Alcohol                       | 3.44±0.2b     | 8.7±0.51a     | 3.41±0.2b     | 4.68±0.28b    | 2.91±0.19a    | 1.49±0.1b     | 3.71±0.25a     | 3.55±0.24a   |
| Benzoic acid, 3,5-dimethyl-               | 2.97±0.18b    | 1.99±0.12c    | 3.98±0.23a    | 1.34±0.08c    | 3.18±0.19c    | 3.03±0.18c    | 6.17±0.36a     | 4.70±0.28b   |
| Styrene                                   | 3.31±0.22b    | 1.86±0.12c    | 4.9±0.33a     | 1.41±0.09c    | nd            | nd            | nd             | nd           |
| Hydroquinone                              | 1.2±0.09bc    | 1.62±0.12b    | 2.39±0.18a    | 0.98±0.07c    | 1.96±0.14b    | 3.69±0.27a    | 1.88±0.14bc    | 1.21±0.09c   |
| <b>Total amount of aromatic compounds</b> | 18.19±0.07c   | 20.16±0.32b   | 22.25±0.03a   | 14.78±0.29d   | 12.47±0.13c   | 14.64±0.2b    | 16.68±0.17a    | 14.8±0.08b   |
| 3-Pentanol, 3-methyl-                     | 3.9±0.26b     | 5.77±0.38b    | 11.03±0.72a   | 9.45±0.62a    | 2.17±0.14c    | 5.03±0.33b    | 9.11±0.6a      | 1.96±0.13c   |
| 1-Hexanol, 2-ethyl-                       | 3.53±0.25b    | 1.88±0.14b    | 6.98±0.5a     | 8.02±0.58a    | nd            | nd            | nd             | nd           |
| Isooctanol                                | 7.18±0.53b    | 6.04±0.45b    | 7.49±0.56b    | 9.98±0.74a    | 4.33±0.32b    | 5.09±0.38ab   | 4.56±0.34b     | 6.22±0.46a   |
| <b>Total amount of branched alcohols</b>  | 14.61±0.53b   | 13.69±0.21b   | 25.5±0.34a    | 27.45±0.7a    | 12.6±0.23c    | 15.7±0.33b    | 19.69±0.66a    | 14.26±0.07b  |
| 4-Methoxy-4-methyl-2-pentanol             | nd            | nd            | nd            | nd            | 6.10±0.41a    | 5.58±0.38a    | 6.02±0.41a     | 6.08±0.41a   |
| Cyclopentanone, 2-methyl-                 | 542.14±31.11b | 734.17±42.14a | 459.28±26.36b | 438.97±25.19b | 589.48±33.83b | 855.82±49.12a | 703.39±40.37ab | 580.2±33.30b |
| <b>Total amount of branched ketones</b>   | 542.14±31.11b | 734.17±42.14a | 459.28±26.36b | 438.97±25.19b | 589.48±33.83b | 855.82±49.12a | 703.39±40.37ab | 580.2±33.3b  |

|                                        |             |             |              |              |             |             |             |             |
|----------------------------------------|-------------|-------------|--------------|--------------|-------------|-------------|-------------|-------------|
| Undecanoic acid, hydroxy-, lactone     | nd          | nd          | nd           | nd           | 3.83±0.27a  | 2.83±0.2b   | 1.44±0.1c   | nd          |
| phenylmethyl acetate                   | 12.78±0.13b | 13.98±0.19a | 10.81±0.04c  | 10.67±0.03c  | 11.40±0.07c | 13.47±0.17a | 12.47±0.12b | 12.82±0.14b |
| 2-methyl-1-butyl acetate               | nd          | nd          | nd           | nd           | 12.00±0.10c | 11.88±0.10c | 12.70±0.14b | 13.38±0.18a |
| phenethyle acetate                     | 11.04±0.01b | 11.97±0.13a | 11.49±0.06ab | 11.57±0.01ab | 11.30±0.05a | 11.85±0.16a | 11.39±0.01a | 11.43±0.02a |
| isoamyl octanoate                      | 12.38±0.03b | 15.28±0.01a | 15.36±0.21a  | 15.65±0.16a  | 12.93±0.17b | 16.35±0.25a | 16.68±0.29a | 16.92±0.03a |
| isoamyl hexanoate                      | 11.25±0.08b | 13.35±0.03a | 13.03±0.11a  | 13.96±0.21a  | 11.58±0.01b | 14.95±0.29a | 15.38±0.34a | 15.72±0.17a |
| <b>Total amount of branched esters</b> | 47.45±0.13b | 54.58±0.19a | 50.69±0.04ab | 51.85±0.03ab | 73.04±0.3b  | 71.33±0.13a | 70.06±0.12a | 70.28±0.04a |

Different letters in the row indicate significant differences ( $P < 0.05$ ) among treatments for the same vintage

nd: not detected.

**Table S3.** concentrations of the amino acids of the standard.

| Amino acid. | WM     | Concentration ( $\mu$ mol/mL) | Concentratio ( $\mu$ g/mL) | Concentration after dilute 5 time ( $\mu$ g/mL) |
|-------------|--------|-------------------------------|----------------------------|-------------------------------------------------|
| Asp         | 133.1  | 2.5                           | 332.8                      | 66.55                                           |
| Glu         | 147.13 | 2.5                           | 367.8                      | 73.57                                           |
| Ser         | 105.09 | 2.5                           | 262.7                      | 52.55                                           |
| Gly         | 75.07  | 2.5                           | 187.7                      | 37.54                                           |
| His         | 155.16 | 2.5                           | 387.9                      | 77.58                                           |
| Arg         | 174.2  | 2.5                           | 435.5                      | 87.10                                           |
| Thr         | 119.12 | 2.5                           | 297.8                      | 59.56                                           |
| Ala         | 89.09  | 2.5                           | 222.7                      | 44.55                                           |
| Pro         | 115.13 | 2.5                           | 287.8                      | 57.57                                           |
| Tyr         | 181.19 | 2.5                           | 453.0                      | 90.60                                           |
| Val         | 117.15 | 2.5                           | 292.9                      | 58.58                                           |
| Met         | 149.21 | 2.5                           | 373.0                      | 74.61                                           |
| Cys-Cys     | 240.3  | 1.25                          | 300.4                      | 60.08                                           |
| Ile         | 131.17 | 2.5                           | 327.9                      | 65.59                                           |
| Leu         | 131.17 | 2.5                           | 327.9                      | 65.59                                           |
| Phe         | 165.19 | 2.5                           | 413.0                      | 82.60                                           |
| Lys         | 146.19 | 2.5                           | 365.5                      | 73.10                                           |
